# Supplementary material for: Structure prediction of the solid forms of methanol: an ab initio random structure searching approach
Source: Royal Society of Chemistry journal article supplement (doi:10.1039/c5cp06583f), 2015-12-14
Supplement: c5cp06583f1.pdf [file c5cp06583f1.pdf]

**Structure Prediction of the Solid Forms of Methanol: An Ab Initio  
Random Structure Searching Approach**

**Supporting Information**

by

Tzu-Jen Lin, Cheng-Rong Hsing, Ching-Ming Wei and Jer-Lai Kuo

Institute of Atomic and Molecular Sciences, Academic Sinica, Taipei City, 10617, Taiwan

Fig. S1. Relative enthalpy–pressure diagrams obtained by different dispersion-corrected functionals. The horizontal axis is pressure (GPa), and the vertical axis is relative enthalpy with respect to the  $\beta$  phase (meV/molecule). The trend for the change of the relative enthalpy with pressures is the same by these four functionals. The range of phase transition pressure for  $\alpha$ – $\delta'$  and  $\alpha$ – $\gamma$  transitions by the PBE-D3 functional is 1.0–1.5 GPa higher than that by the optB86b functional. A similar trend was also observed on PBE-D2 and optB88 functionals. In summary, Grimme-type dispersion-corrected functionals predicted slightly higher phase transition pressure than vdW-DF functionals did.

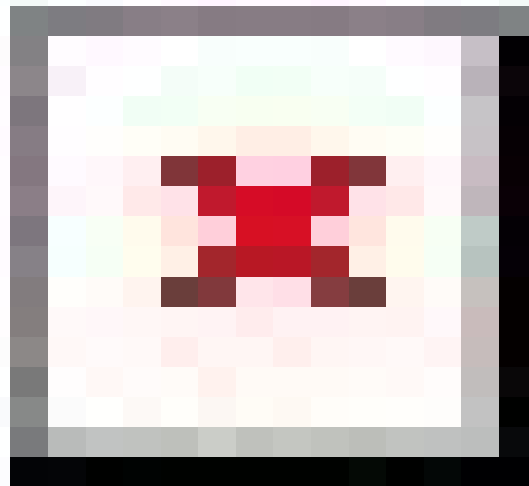

Fig. S2 The first 200 structures from AIRSS constrained by (a) the lattice parameter of the  $\alpha$  phase with four methanol molecules and (b) The lattice parameter of the  $\gamma$  phase with six methanol molecules.  $P1$  and  $\bar{P}1$  space groups were implemented during the search. The vertical axis is the energy in meV per molecule relative to the structure with the lowest energy on each search.

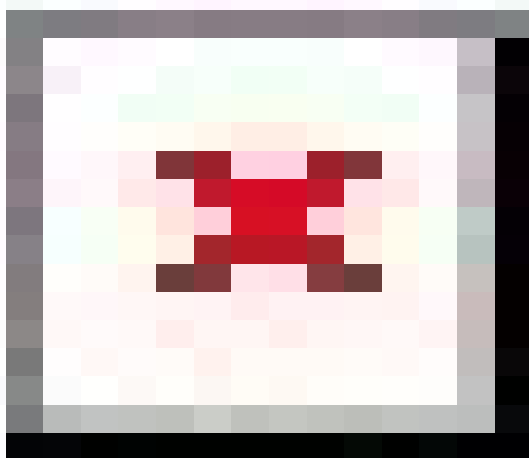

Fig. S3. Energy-unfavorable packing (dashed green circle) of methanol molecules in 4R2S. The OH $\cdots$ O hydrogen bond is depicted using blue dashed lines.

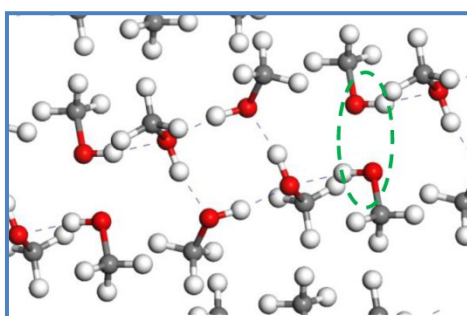

Fig. S4. Photocopy of the phase diagram of methanol based on the anomalies of the static dielectric constant by Kondrin (*The Journal of Chemical Physics* 139, 084510, 2013). The points correspond to experimental data, and the solid lines are drawn by eye observations of the data. The gray area indicates the region of methanol glass formation, and the blue arrow represents the " $\beta$ - $\beta$ " phase transition suggested by the author. The dashed line between  $\alpha$  and  $\gamma$  phases is used because the author could not determine the phase boundary through the experiment. The phase diagram also displays the unit cell information of different phases such as symmetry, molecule number, and isotropy order parameter. However, some information differs from that in other studies, and the author did not explain the discrepancies in the article. To avoid confusion among readers, this phase diagram is placed in the supporting information. Reprinted with permission from [*The Journal of Chemical Physics* 139, 084510, 2013]. Copyright [2013], American Institute of Physics

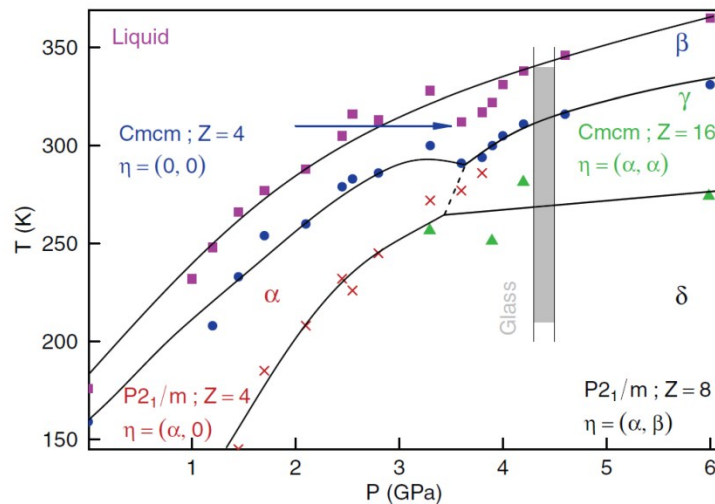

```

data_4R-optb86-45gpa
_audit_creation_date      2015-12-08
_symmetry_space_group_name_H-M  'P1'
_symmetry_Int_Tables_number  1
_symmetry_cell_setting    triclinic
loop_
_symmetry_equiv_pos_as_xyz
  x,y,z
_cell_length_a            5.6736
_cell_length_b            6.4470
_cell_length_c            4.2969
_cell_angle_alpha         89.4739
_cell_angle_beta          78.7011
_cell_angle_gamma         77.6045
loop_
_atom_site_label
_atom_site_type_symbol
_atom_site_fract_x
_atom_site_fract_y
_atom_site_fract_z
_atom_site_U_iso_or_equiv
_atom_site_adp_type
_atom_site_occupancy
C1      C      0.21532  0.70239  0.04793  0.01267  Uiso  1.00
C2      C      0.78468  0.29761  0.95207  0.01267  Uiso  1.00
C3      C      0.29143  0.15267  0.32898  0.01267  Uiso  1.00
C4      C      0.70857  0.84733  0.67102  0.01267  Uiso  1.00
O1      O      0.24243  0.67985  0.37117  0.01267  Uiso  1.00
O2      O      0.75757  0.32015  0.62883  0.01267  Uiso  1.00
O3      O      0.31337  0.29605  0.57084  0.01267  Uiso  1.00
O4      O      0.68663  0.70395  0.42916  0.01267  Uiso  1.00
H1      H      0.06220  0.63146  0.01853  0.01267  Uiso  1.00
H2      H      0.93780  0.36854  0.98147  0.01267  Uiso  1.00
H3      H      0.46334  0.03184  0.26704  0.01267  Uiso  1.00
H4      H      0.53666  0.96816  0.73296  0.01267  Uiso  1.00
H5      H      0.17137  0.87128  0.98729  0.01267  Uiso  1.00
H6      H      0.82863  0.12872  0.01271  0.01267  Uiso  1.00
H7      H      0.13808  0.07537  0.41796  0.01267  Uiso  1.00
H8      H      0.86192  0.92463  0.58204  0.01267  Uiso  1.00
H9      H      0.38404  0.62159  0.88600  0.01267  Uiso  1.00
H10     H      0.61596  0.37841  0.11400  0.01267  Uiso  1.00
H11     H      0.25897  0.23742  0.11310  0.01267  Uiso  1.00
H12     H      0.74103  0.76258  0.88690  0.01267  Uiso  1.00
H13     H      0.40890  0.70652  0.38930  0.01267  Uiso  1.00
H14     H      0.59110  0.29349  0.61070  0.01267  Uiso  1.00
H15     H      0.26226  0.44644  0.49944  0.01267  Uiso  1.00
H16     H      0.73774  0.55356  0.50056  0.01267  Uiso  1.00

```

```

data_4R2S-optb86-45gpa
_audit_creation_date      2015-12-08
_symmetry_space_group_name_H-M  'P1'
_symmetry_Int_Tables_number  1
_symmetry_cell_setting    triclinic
loop_
_symmetry_equiv_pos_as_xyz
  x,y,z
_cell_length_a           7.7119
_cell_length_b           4.3862
_cell_length_c           7.0813
_cell_angle_alpha        85.2508
_cell_angle_beta         111.2632
_cell_angle_gamma        98.9526
loop_
_atom_site_label
_atom_site_type_symbol
_atom_site_fract_x
_atom_site_fract_y
_atom_site_fract_z
_atom_site_U_iso_or_equiv
_atom_site_adp_type
_atom_site_occupancy
C1      C      0.64802  0.65453  0.38825  0.01267  Uiso  1.00
C2      C      0.35198  0.34547  0.61175  0.01267  Uiso  1.00
C3      C      0.74057  0.96324  0.84598  0.01267  Uiso  1.00
C4      C      0.25943  0.03676  0.15402  0.01267  Uiso  1.00
C5      C      0.11975  0.77512  0.69936  0.01267  Uiso  1.00
C6      C      0.88025  0.22488  0.30064  0.01267  Uiso  1.00
O1      O      0.58691  0.64703  0.17412  0.01267  Uiso  1.00
O2      O      0.41309  0.35296  0.82589  0.01267  Uiso  1.00
O3      O      0.76233  0.64080  0.86595  0.01267  Uiso  1.00
O4      O      0.23767  0.35920  0.13405  0.01267  Uiso  1.00
O5      O      0.03508  0.49359  0.76999  0.01267  Uiso  1.00
O6      O      0.96493  0.50641  0.23001  0.01267  Uiso  1.00
H1      H      0.62105  0.42544  0.45641  0.01267  Uiso  1.00
H2      H      0.37895  0.57456  0.54359  0.01267  Uiso  1.00
H3      H      0.72342  0.04292  0.69010  0.01267  Uiso  1.00
H4      H      0.27658  0.95708  0.30990  0.01267  Uiso  1.00
H5      H      0.27062  0.80863  0.78775  0.01267  Uiso  1.00
H6      H      0.72938  0.19137  0.21225  0.01267  Uiso  1.00
H7      H      0.79944  0.72899  0.44619  0.01267  Uiso  1.00
H8      H      0.20056  0.27101  0.55381  0.01267  Uiso  1.00
H9      H      0.61825  0.99787  0.88253  0.01267  Uiso  1.00
H10     H      0.38175  0.00213  0.11747  0.01267  Uiso  1.00
H11     H      0.09711  0.75586  0.53824  0.01267  Uiso  1.00
H12     H      0.90289  0.24414  0.46176  0.01267  Uiso  1.00
H13     H      0.57782  0.81805  0.43659  0.01267  Uiso  1.00
H14     H      0.42218  0.18195  0.56341  0.01267  Uiso  1.00
H15     H      0.86678  0.09727  0.94917  0.01267  Uiso  1.00
H16     H      0.13322  0.90273  0.05083  0.01267  Uiso  1.00
H17     H      0.05806  0.97390  0.71977  0.01267  Uiso  1.00
H18     H      0.94194  0.02610  0.28023  0.01267  Uiso  1.00
H19     H      0.45507  0.54518  0.12958  0.01267  Uiso  1.00
H20     H      0.54493  0.45482  0.87042  0.01267  Uiso  1.00
H21     H      0.83219  0.59414  0.01698  0.01267  Uiso  1.00
H22     H      0.16781  0.40586  0.98302  0.01267  Uiso  1.00
H23     H      0.91859  0.54183  0.78829  0.01267  Uiso  1.00
H24     H      0.08141  0.45817  0.21171  0.01267  Uiso  1.00

```

```

data_6R-optb86-45gpa
_audit_creation_date      2015-12-08
_symmetry_space_group_name_H-M  'P1'
_symmetry_Int_Tables_number  1
_symmetry_cell_setting    triclinic
loop_
_symmetry_equiv_pos_as_xyz
  x,y,z
_cell_length_a            7.6029
_cell_length_b            4.5623
_cell_length_c            7.0798
_cell_angle_alpha        91.1541
_cell_angle_beta         107.4970
_cell_angle_gamma        91.9418
loop_
_atom_site_label
_atom_site_type_symbol
_atom_site_fract_x
_atom_site_fract_y
_atom_site_fract_z
_atom_site_U_iso_or_equiv
_atom_site_adp_type
_atom_site_occupancy
C1      C      0.99911  0.60512  0.73849  0.01267  Uiso  1.00
C2      C      0.00089  0.39488  0.26151  0.01267  Uiso  1.00
C3      C      0.74687  0.90234  0.97086  0.01267  Uiso  1.00
C4      C      0.25313  0.09766  0.02914  0.01267  Uiso  1.00
C5      C      0.34896  0.10135  0.62529  0.01267  Uiso  1.00
C6      C      0.65104  0.89865  0.37471  0.01267  Uiso  1.00
O1      O      0.83938  0.41071  0.69854  0.01267  Uiso  1.00
O2      O      0.16062  0.58929  0.30146  0.01267  Uiso  1.00
O3      O      0.65047  0.62129  0.91837  0.01267  Uiso  1.00
O4      O      0.34953  0.37871  0.08163  0.01267  Uiso  1.00
O5      O      0.36445  0.79115  0.64400  0.01267  Uiso  1.00
O6      O      0.63555  0.20885  0.35600  0.01267  Uiso  1.00
H1      H      0.96416  0.82357  0.67720  0.01267  Uiso  1.00
H2      H      0.03584  0.17643  0.32280  0.01267  Uiso  1.00
H3      H      0.66820  0.05583  0.03236  0.01267  Uiso  1.00
H4      H      0.33180  0.94417  0.96764  0.01267  Uiso  1.00
H5      H      0.20746  0.16286  0.61447  0.01267  Uiso  1.00
H6      H      0.79254  0.83714  0.38553  0.01267  Uiso  1.00
H7      H      0.06693  0.63048  0.89878  0.01267  Uiso  1.00
H8      H      0.93307  0.36952  0.10122  0.01267  Uiso  1.00
H9      H      0.87869  0.86641  0.08351  0.01267  Uiso  1.00
H10     H      0.12131  0.13359  0.91649  0.01267  Uiso  1.00
H11     H      0.44295  0.20940  0.75918  0.01267  Uiso  1.00
H12     H      0.55705  0.79060  0.24082  0.01267  Uiso  1.00
H13     H      0.09720  0.50950  0.67194  0.01267  Uiso  1.00
H14     H      0.90280  0.49050  0.32806  0.01267  Uiso  1.00
H15     H      0.77505  0.00180  0.84201  0.01267  Uiso  1.00
H16     H      0.22495  0.99820  0.15798  0.01267  Uiso  1.00
H17     H      0.38544  0.17842  0.49486  0.01267  Uiso  1.00
H18     H      0.61456  0.82158  0.50514  0.01267  Uiso  1.00
H19     H      0.71434  0.30667  0.48415  0.01267  Uiso  1.00
H20     H      0.28566  0.69333  0.51585  0.01267  Uiso  1.00
H21     H      0.75967  0.47999  0.78202  0.01267  Uiso  1.00
H22     H      0.24033  0.52001  0.21799  0.01267  Uiso  1.00
H23     H      0.52898  0.66235  0.81822  0.01267  Uiso  1.00
H24     H      0.47102  0.33765  0.18178  0.01267  Uiso  1.00

```

```

data_delta-optb86-45gpa
_audit_creation_date          2015-12-08
_symmetry_space_group_name_H-M  'P1'
_symmetry_Int_Tables_number    1
_symmetry_cell_setting        triclinic
loop_
_symmetry_equiv_pos_as_xyz
  x,y,z
_cell_length_a                8.9772
_cell_length_b                5.0184
_cell_length_c                6.0359
_cell_angle_alpha             108.1112
_cell_angle_beta              117.9254
_cell_angle_gamma             71.1899
loop_
_atom_site_label
_atom_site_type_symbol
_atom_site_fract_x
_atom_site_fract_y
_atom_site_fract_z
_atom_site_U_iso_or_equiv
_atom_site_adp_type
_atom_site_occupancy
C1      C      0.57156  0.19141  0.00949  0.01267  Uiso  1.00
C2      C      0.19488  0.96175  0.64864  0.01267  Uiso  1.00
C3      C      0.32068  0.08879  0.28489  0.01267  Uiso  1.00
C4      C      0.94106  0.47042  0.36604  0.01267  Uiso  1.00
C5      C      0.69018  0.36780  0.64144  0.01267  Uiso  1.00
C6      C      0.06686  0.59745  0.00229  0.01267  Uiso  1.00
O1      O      0.43812  0.44503  0.00157  0.01267  Uiso  1.00
O2      O      0.33734  0.72653  0.64921  0.01267  Uiso  1.00
O3      O      0.45793  0.86010  0.39217  0.01267  Uiso  1.00
O4      O      0.80381  0.69911  0.25876  0.01267  Uiso  1.00
O5      O      0.82362  0.11418  0.64935  0.01267  Uiso  1.00
O6      O      0.92440  0.83268  0.00171  0.01267  Uiso  1.00
H1      H      0.55051  0.03763  0.08186  0.01267  Uiso  1.00
H2      H      0.09342  0.96462  0.45419  0.01267  Uiso  1.00
H3      H      0.19572  0.02315  0.17801  0.01267  Uiso  1.00
H4      H      0.06603  0.53606  0.47292  0.01267  Uiso  1.00
H5      H      0.71123  0.52158  0.56906  0.01267  Uiso  1.00
H6      H      0.12148  0.62502  0.88425  0.01267  Uiso  1.00
H7      H      0.56788  0.08970  0.81773  0.01267  Uiso  1.00
H8      H      0.14027  0.93418  0.76667  0.01267  Uiso  1.00
H9      H      0.31237  0.26641  0.44250  0.01267  Uiso  1.00
H10     H      0.91532  0.39307  0.49355  0.01267  Uiso  1.00
H11     H      0.56296  0.31691  0.51438  0.01267  Uiso  1.00
H12     H      0.16832  0.59458  0.19673  0.01267  Uiso  1.00
H13     H      0.69878  0.24230  0.13654  0.01267  Uiso  1.00
H14     H      0.23694  0.16728  0.72913  0.01267  Uiso  1.00
H15     H      0.34642  0.16615  0.15738  0.01267  Uiso  1.00
H16     H      0.94937  0.29279  0.20843  0.01267  Uiso  1.00
H17     H      0.69386  0.46951  0.83320  0.01267  Uiso  1.00
H18     H      0.02479  0.39193  0.92180  0.01267  Uiso  1.00
H19     H      0.41669  0.54761  0.86600  0.01267  Uiso  1.00
H20     H      0.39668  0.76518  0.55809  0.01267  Uiso  1.00
H21     H      0.46252  0.69182  0.24692  0.01267  Uiso  1.00
H22     H      0.79923  0.86740  0.40400  0.01267  Uiso  1.00
H23     H      0.84505  0.01160  0.78492  0.01267  Uiso  1.00
H24     H      0.86507  0.79404  0.09284  0.01267  Uiso  1.00

```



```

data_4S-optb86-0gpa
_audit_creation_date      2015-12-08
_symmetry_space_group_name_H-M  'P1'
_symmetry_Int_Tables_number  1
_symmetry_cell_setting    triclinic
loop_
_symmetry_equiv_pos_as_xyz
  x,y,z
_cell_length_a            6.3982
_cell_length_b            13.6633
_cell_length_c            4.7134
_cell_angle_alpha        95.4667
_cell_angle_beta         89.9664
_cell_angle_gamma        90.0554
loop_
_atom_site_label
_atom_site_type_symbol
_atom_site_fract_x
_atom_site_fract_y
_atom_site_fract_z
_atom_site_U_iso_or_equiv
_atom_site_adp_type
_atom_site_occupancy
C1      C      0.33010  0.11280  0.45039  0.01267  Uiso  1.00
C2      C      0.26528  0.34589  0.11869  0.01267  Uiso  1.00
C3      C      0.88824  0.04442  0.93650  0.01267  Uiso  1.00
C4      C      0.82382  0.27795  0.60467  0.01267  Uiso  1.00
C5      C      0.32434  0.61268  0.44963  0.01267  Uiso  1.00
C6      C      0.38947  0.84505  0.11731  0.01267  Uiso  1.00
C7      C      0.76528  0.54519  0.93625  0.01267  Uiso  1.00
C8      C      0.83029  0.77795  0.60409  0.01267  Uiso  1.00
O1      O      0.39959  0.03808  0.62420  0.01267  Uiso  1.00
O2      O      0.34664  0.35964  0.40422  0.01267  Uiso  1.00
O3      O      0.80776  0.03106  0.65045  0.01267  Uiso  1.00
O4      O      0.75473  0.35241  0.42970  0.01267  Uiso  1.00
O5      O      0.25520  0.53842  0.62556  0.01267  Uiso  1.00
O6      O      0.30679  0.85949  0.40213  0.01267  Uiso  1.00
O7      O      0.84715  0.53113  0.65093  0.01267  Uiso  1.00
O8      O      0.89883  0.85233  0.42820  0.01267  Uiso  1.00
H1      H      0.37483  0.18672  0.54506  0.01267  Uiso  1.00
H2      H      0.09279  0.34661  0.12149  0.01267  Uiso  1.00
H3      H      0.06065  0.04181  0.93495  0.01267  Uiso  1.00
H4      H      0.75949  0.29016  0.82329  0.01267  Uiso  1.00
H5      H      0.39411  0.10090  0.23153  0.01267  Uiso  1.00
H6      H      0.32263  0.40317  0.98792  0.01267  Uiso  1.00
H7      H      0.83780  0.11735  0.03146  0.01267  Uiso  1.00
H8      H      0.77917  0.20392  0.51069  0.01267  Uiso  1.00
H9      H      0.15854  0.10849  0.43949  0.01267  Uiso  1.00
H10     H      0.31895  0.27368  0.02228  0.01267  Uiso  1.00
H11     H      0.82728  0.98804  0.06775  0.01267  Uiso  1.00
H12     H      0.99537  0.28223  0.61605  0.01267  Uiso  1.00
H13     H      0.55786  0.03963  0.63687  0.01267  Uiso  1.00
H14     H      0.30953  0.42846  0.48899  0.01267  Uiso  1.00
H15     H      0.84463  0.96222  0.56546  0.01267  Uiso  1.00
H16     H      0.59643  0.35101  0.41714  0.01267  Uiso  1.00
H17     H      0.27952  0.68676  0.54270  0.01267  Uiso  1.00
H18     H      0.33697  0.90326  0.98677  0.01267  Uiso  1.00
H19     H      0.82094  0.48768  0.06713  0.01267  Uiso  1.00
H20     H      0.65871  0.78183  0.61564  0.01267  Uiso  1.00
H21     H      0.49591  0.60858  0.43835  0.01267  Uiso  1.00
H22     H      0.56189  0.84349  0.12170  0.01267  Uiso  1.00

```

|     |   |         |         |         |         |      |      |
|-----|---|---------|---------|---------|---------|------|------|
| H23 | H | 0.82035 | 0.61717 | 0.03285 | 0.01267 | Uiso | 1.00 |
| H24 | H | 0.87545 | 0.70394 | 0.51082 | 0.01267 | Uiso | 1.00 |
| H25 | H | 0.26022 | 0.60008 | 0.23106 | 0.01267 | Uiso | 1.00 |
| H26 | H | 0.33175 | 0.77371 | 0.01953 | 0.01267 | Uiso | 1.00 |
| H27 | H | 0.59280 | 0.54517 | 0.93299 | 0.01267 | Uiso | 1.00 |
| H28 | H | 0.89454 | 0.79059 | 0.82259 | 0.01267 | Uiso | 1.00 |
| H29 | H | 0.09689 | 0.53973 | 0.63820 | 0.01267 | Uiso | 1.00 |
| H30 | H | 0.34478 | 0.92825 | 0.48670 | 0.01267 | Uiso | 1.00 |
| H31 | H | 0.80956 | 0.46231 | 0.56640 | 0.01267 | Uiso | 1.00 |
| H32 | H | 0.05713 | 0.85108 | 0.41496 | 0.01267 | Uiso | 1.00 |
